# Resolving atomic site interactions of the *Y. pestis* outer membrane protein Ail with human serum in the bacterial cell envelope

James E. Kent <sup>a</sup>, Lynn M. Fujimoto <sup>a</sup>, Kyungsoo Shin <sup>a</sup>, Chandan Singh <sup>a,d</sup>, Yong Yao <sup>a</sup>, Sang Ho Park <sup>b</sup>, Stanley J. Opella <sup>b</sup>, Gregory V. Plano <sup>c</sup>, and Francesca M. Marassi <sup>a\*</sup>

<sup>a</sup>Cancer Center, Sanford Burnham Prebys Medical Discovery Institute, 10901 North Torrey Pines Road, La Jolla CA, 92037, USA.

<sup>b</sup>Department of Chemistry and Biochemistry University of California San Diego, La Jolla, CA, 92037, USA.

<sup>c</sup>Department of Microbiology and Immunology, University of Miami Miller School of Medicine, Miami, FL 33101, USA

<sup>d</sup>Present address: Department of Biochemistry, Institute of Science, Banaras Hindu University (BHU), Varanasi, Pin-221005

\*Corresponding author: [fmarassi@sbp.edu](mailto:fmarassi@sbp.edu)

## ABSTRACT

Understanding microbe-host interactions at the molecular level is a major goal of fundamental biology and therapeutic drug development. Structural biology efforts strive to capture biomolecular structures in action, but the samples are often highly simplified versions of the complex native environment. Here we present an *E. coli* model system that allows us to probe the structure and function of Ail, the major surface protein of the deadly pathogen *Yersinia pestis*. Cell surface expression of Ail produces *Y. pestis* virulence phenotypes in *E. coli*, including resistance to human serum, pellicle formation and vitronectin co-sedimentation. Using nuclear magnetic resonance (NMR) with isolated bacterial cell envelopes, encompassing inner and outer membranes, we identify Ail sites that are sensitive to the bacterial membrane environment and involved in interactions with human serum components. The data capture the structure and function of Ail in a bacterial outer membrane and set the stage for probing its interactions with the complex milieu of immune response proteins present in human serum.

## 37 INTRODUCTION

38 The protein and lipid components of bacterial outer membranes work together to support microbial cell survival  
 39 in a wide range of host environments and represent key virulence factors. This phenomenon is especially  
 40 striking in the case of *Yersinia pestis* – the agent responsible for multiple devastating human plague pandemics  
 41 throughout history. The outer membrane protein Adhesion invasion locus (Ail) and the lipopolysaccharide  
 42 (LPS) have co-evolved to enhance microbial resistance to human innate immunity, enabling *Y. pestis* to produce  
 43 high-level septicemia in its mammalian hosts [1-11]. Ail and LPS jointly promote evasion of the host immune  
 44 defenses and adhesion/invasion of host cells [9-11], with Ail and LPS mutants exhibiting altered sensitivity to  
 45 human serum, antibiotics and cell wall stress [12-14]. Recently, we identified an LPS-recognition motif on the  
 46 surface of Ail important for establishing mutually reinforcing Ail-LPS interactions that promote microbial  
 47 survival in human serum, antibiotic resistance and cell envelope integrity [14]. These features highlight the role  
 48 of the outer membrane environment as a critical regulator of Ail activity and underscore the importance of  
 49 characterizing the native Ail-membrane assembly as a whole, rather than its individual components.

50 Previous structural studies have relied on purified Ail refolded in detergent micelles, detergent-free lipid  
 51 nanodiscs or liposomes for X-ray diffraction and NMR [15-19]. We have shown that nanodiscs and liposomes  
 52 can incorporate Ail with various types of LPS, including native *Y. pestis* LPS [14,19], but while these detergent-  
 53 free platforms represent important advances in membrane complexity, they remain distant substitutes for the  
 54 native outer membrane environment, which is highly anisotropic, heterogeneous, and connected to the  
 55 cytoskeletal peptidoglycan layer. The emerging field of *in-situ* NMR [20-25] presents new opportunities for  
 56 examining the structural properties of functional Ail in a native bacterial outer membrane.

57 Here we describe an *E. coli* model system where Ail is natively folded in the bacterial outer membrane for  
 58 parallel solid-state NMR structural studies and microbial functional assays, *in-situ*. Using this model, we  
 59 demonstrate that Ail expression produces *Y. pestis* virulence phenotypes in *E. coli*, and that isolated cell  
 60 envelopes expressing <sup>15</sup>N and <sup>13</sup>C labeled Ail yield atomic-resolution NMR spectra that allow us to probe the  
 61 structure of Ail in a native bacterial membrane and its interactions with human serum components. This model  
 62 sheds light on the interactions of Ail with components of human serum and provides a platform for advancing  
 63 structure-activity NMR studies of Ail in the native environment.

## 64 RESULTS AND DISCUSSION

65 **Production of folded Ail in the outer membrane of *E. coli*.** High-resolution, multi-dimensional NMR studies  
 66 require isotopically <sup>15</sup>N and <sup>13</sup>C labeled biomolecules. For studies of proteins in native cell membranes, targeted  
 67 isotopic labeling is critical for suppressing background NMR signals from other cellular components, and  
 68 solid-state NMR methods are needed to overcome the correlation time limitations posed by samples that are  
 69 effectively immobilized on a time scale  $\geq \mu\text{sec}$ . Moreover, the inherently low sensitivity of NMR necessitates  
 70 samples that are enriched in target protein. This requirement is compatible with the properties of Ail, which  
 71 naturally comprises more than 30% of the *Y. pestis* outer membrane proteome at the mammalian infection  
 72 temperature of 37°C [6,9,26-28].

74 *E. coli* is widely used as a model for assaying the functions of *Y. pestis* proteins, including Ail. *E. coli* strains  
 75 derived from BL21(DE3) have a rough-type LPS that lacks an extended O-antigen, similar to that of *Y. pestis*,  
 76 and we have shown that *E. coli* rough-type LPS and *Y. pestis* LPS both perturb the NMR spectra of Ail in a  
 77 similar manner [14]. The use of *E. coli* also facilitates isotope labeling for NMR.

78 To drive the production of folded, <sup>15</sup>N/<sup>13</sup>C-Ail in the *E. coli* outer membrane, we cloned the sequence of the  
 79 peptate lyase B (PelB) leader peptide [29] before the N-terminus of mature Ail, and relied on the *E. coli* native  
 80  $\beta$ -barrel assembly machinery (BAM) to insert Ail across the bacterial outer membrane. To reduce isotopic  
 81 labeling of endogenous *E. coli* components, the cells were grown in unlabeled minimal media and transferred  
 82 to isotopically labeled media only prior to induction with IPTG. We tested Ail expression in three derivative

strains of *E. coli* BL21(DE3) [30], where recombinant protein expression is controlled by a chromosomally-encoded, IPTG-inducible polymerase from bacteriophage T7 and its plasmid-encoded T7 promoter.

Our initial attempts utilized C41(DE3) cells [31], which promote folded protein insertion in the *E. coli* membrane due to a mutation that weakens the production of T7 polymerase [32]. These cells yield high expression of correctly folded Ail (Fig. 1A), but also produce appreciable amounts of isotopically labeled endogenous *E. coli* proteins. Background NMR signal can be reduced by expressing Ail in BL21(DE3)ΔACF, a mutant cell strain that lacks the major *E. coli* outer membrane proteins OmpA, OmpC and OmpF [33]. Compared to C41 strains, this mutant is compatible with the use of rifampicin, a potent inhibitor of *E. coli* RNA polymerase [34] that suppresses endogenous *E. coli* protein production and has been used to enable targeted isotopic labeling of heterologous proteins for solution [35] and solid-state [36] NMR studies *in situ*. These cells produced very high levels of Ail (Fig. 1B). Their usefulness, however, remained limited by the production of large amounts of misfolded protein, detectable as a band migrating just above 17 kDa in sodium dodecyl sulfate polyacrylamide gel electrophoresis (SDS-PAGE) that is distinguishable from folded Ail at 14 kDa [17]. The addition of rifampicin, in this case, reduces protein expression levels overall, but does not enhance the proportion of folded to unfolded Ail.

Endogenous background signal can be reduced by isolating the outer membrane from the cell envelope, although this process exposes the sample to the compromising effects of detergent on biomolecular structure and activity [37,38]. The two-dimensional (2D)  $^{15}\text{N}/^{13}\text{C}$  NCA solid-state NMR spectra from outer membrane preparations of either C41(DE3) or BL21(DE3)ΔACF cells reflect the overall signature of Ail [17-19] but suffer from sub-optimal resolution and sensitivity (Fig. S1).

To avoid these complications we tested Lemo21(DE3) cells [32], where T7 RNA polymerase can be controlled by its natural inhibitor T7 lysozyme, and rifampicin can be used to effectively halt transcription of the *E. coli* genome. By initially growing the cells in unlabeled minimal media, then transferring them to isotopically labeled media supplemented with both rifampicin and IPTG, expression of  $^{15}\text{N}/^{13}\text{C}$ -Ail was induced and allowed to continue under control of the bacteriophage T7 promoter, while endogenous protein production was blocked. As an additional advantage, we found that rifampicin moderates the level of Ail overexpression and

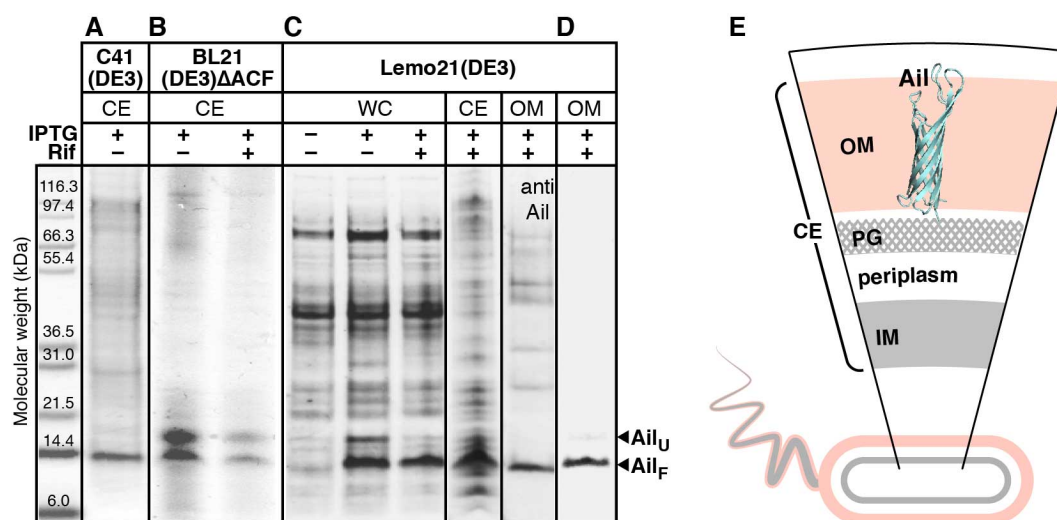

**Figure 1. Production of folded Ail in *E. coli* and in situ NMR of Ail in *E. coli* cell envelopes.** (A-D) SDS-PAGE analysis of Ail in cell envelope (CE), whole cell (WC), or outer membrane (OM) fractions isolated from *E. coli* C41(DE3), BL21(DE3)ΔACF, or Lemo21(DE3) cells. Cells were grown with or without rifampicin and induced with IPTG. Ail was visualized with Coomassie stain (A-C) or immunoblotting with Ail-specific antibody (D). (E) Depiction of the bacterial cell envelope (CE) fraction isolated for NMR studies, including the outer membrane (OM) with embedded Ail (cyan), inner membrane (IM), peptidoglycan layer (PG), and periplasm.

reduces protein misfolding to negligible levels (Fig. 1C, D). The resulting cell envelope (Fig. 1E) and outer membrane fractions isolated from these cells are highly enriched in folded Ail.

**Solid-state NMR of  $^{15}\text{N}/^{13}\text{C}$  labeled Ail in bacterial cell envelopes.** Cell envelope preparations from Lemo21(DE3) cells yield high quality 2D  $^{15}\text{N}/^{13}\text{C}$  solid-state NMR spectra, with respect to both signal intensity and resolution (Fig. 2A, black), demonstrating that the combined use of this cell strain with rifampicin is highly beneficial for producing folded, isotopically labeled Ail, with minimal background. Many resonances can be assigned by direct comparison with the solid-state and solution NMR spectra of purified Ail reconstituted in liposomes (Fig. 2A, red) or nanodiscs [18,19], indicating that the same overall structure – an eight-stranded  $\beta$ -barrel with four extracellular loops (EL1-EL4) and three intracellular turns (T1-T3) [15,16,19] – is preserved in the bacterial outer membrane. Within the 2D  $^{15}\text{N}/^{13}\text{C}$  spectrum, there are some new signals and 47 cross-peaks are sufficiently resolved to facilitate the detection of site-specific chemical shift perturbations for residues dispersed across the Ail sequence and its  $\beta$ -barrel topology.

The  $^1\text{H}$ ,  $^{15}\text{N}$  and  $^{13}\text{C}$  chemical shifts from backbone sites are sensitive to chemical environment, ligand binding and protein conformational changes [39]. To examine the effects of the native membrane environment on Ail, we acquired a  $^1\text{H}$ -detected  $^1\text{H}/^{15}\text{N}$  cross polarization (CP) solid-state NMR spectrum of Ail in bacterial cell envelopes (Fig. 2B, black). Typically,  $^2\text{H}$  labeling is needed to achieve line narrowing and high sensitivity in  $^1\text{H}$ -detected solid-state NMR experiments with MAS rates  $\sim 60$  kHz. In this study, we prepared the sample by initially growing cells in  $^2\text{H}_2\text{O}$ , and then transferring the culture to  $^1\text{H}_2\text{O}$ , with  $^{15}\text{N}$  salts and rifampicin, for Ail induction. The goal was to silence the background by  $^2\text{H}$  labeling ( $\sim 70\%$ ) of endogenous *E. coli* lipid and

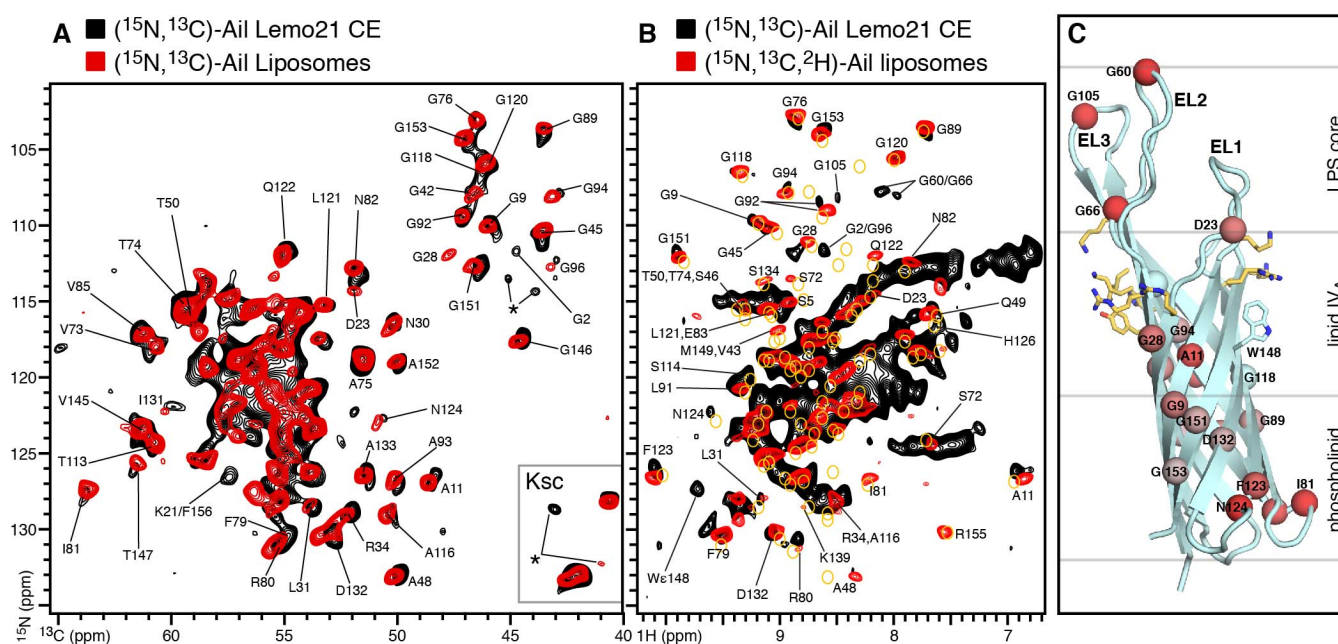

**Figure 2. Solid-state  $^{15}\text{N}/^{13}\text{C}/^1\text{H}$  NMR spectra of Ail in *E. coli* cell envelopes.** (A) 2D  $^{15}\text{N}/^{13}\text{C}$  NCA spectra of  $^{15}\text{N}/^{13}\text{C}$ -Ail in *E. coli* cell envelopes (black) or reconstituted liposomes (red). Spectra were recorded at 750 MHz,  $7^\circ\text{C}$ , with a MAS rate of 11 kHz and 640 transients for the cell envelope samples or 128 transients for the liposome samples. Resolvable assigned peaks are marked. Asterisks denote new unassigned peaks. (B)  $^1\text{H}$ -detected  $^1\text{H}/^{15}\text{N}$  CP-HSQC spectra of  $^{15}\text{N}$ -Ail in *E. coli* cell envelopes (black) or in reconstituted liposomes (red). Spectra were recorded at 900 MHz,  $30^\circ\text{C}$ , with a MAS rate of 57 kHz and 1,600 transients for the cell envelope sample or 160 transients for the liposome samples. (C) Structural model of Ail embedded in the *Y. pestis* outer membrane taken from previous MD simulations [14]. Spheres denote resolved and assigned amide N atoms that undergo  $^1\text{H}/^{15}\text{N}$  chemical shift perturbations from 0 ppm (cyan) to 0.15 ppm (red), between the cell envelope and liposome environments. Sidechains forming two clusters of LPS-recognition motifs are shown as yellow sticks. The boundaries of the outer membrane phospholipid and LPS layers are marked (gray lines). Residue numbers, from E1 to F156, corresponds to the mature sequence of Ail.



protein components, whilst achieving targeted  $^{15}\text{N}$  labeling of Ail. The resulting 2D CP-HSQC spectrum is strikingly good, despite the lack of Ail deuteration.

The cell envelope spectrum, obtained at 900 MHz  $^1\text{H}$  frequency and 30°C, compares favorably with the CP-HSQC solid-state NMR spectrum of fractionally deuterated (~70%) Ail in liposomes, which was obtained at the same field and temperature [18] (Fig. 2B, red), and also with the TROSY-HSQC solution NMR spectrum of uniformly deuterated (~99%) Ail in nanodiscs, obtained at 800 MHz and 45°C (Fig. S2) [18,19]. Individual resonances have line widths in the range of 0.15 ppm (135 Hz) for  $^1\text{H}$  and 1.5 ppm (135 Hz) for  $^{15}\text{N}$ , in line with recent reports of  $^1\text{H}$ -detected spectra of membrane proteins in native cell membranes [40]. A total of 22  $^1\text{H}/^{15}\text{N}$  peaks can be resolved and assigned by direct comparison with the previously assigned solution NMR spectra of nanodiscs and solid-state NMR spectra of liposomes [18,19].

Previously, we showed that Ail acquires conformational order in the presence of LPS, leading to substantial enhancement of solid-state NMR CP signal intensity [19]. Moreover, all-atom MD simulations [14] indicate that the extracellular loops of Ail exhibit dramatically reduced root mean square fluctuations in a native bacterial membrane and hence corroborate the experimental results. In line with these earlier observations, the NCA and CP-HSQC spectra of Ail in cell envelopes contain some new signals, which were not previously observed in the spectra from reconstituted liposomes. These include HN peaks assigned in the solution NMR spectra of nanodiscs (G2, G60, G66, G105, S114, and the side chain of W148), as well as new unassigned peaks. The data indicate that the conformational dynamics of Ail in *E. coli* outer membranes are restricted and, hence, favorable for observation by CP.

Spectral comparisons reveal chemical shift differences between the chemically defined liposome membrane environment and the bacterial cell envelope (Fig. 2C; Table S1). High resolution spectroscopy and independent spectroscopic assignments will be needed to fully and precisely map the effects of the bacterial membrane environment on the protein. Nevertheless, some prominent differences are detectable. These map to sites in the extracellular loops (D23, G60, G66, G105) and near the extracellular membrane-water interface (A11, G28, A48, G92, G94), just below the two clusters of positively charged residues that we identified, recently, as LPS-recognition motifs on opposite poles of the Ail  $\beta$ -barrel [14]: cluster I (R14, K16, K144 and K139), which is tightly localized to the base of the two short extracellular loops EL1 and EL4, and cluster II which occupies a broader region on the barrel surface extending from the base (R27, R51, H95) to the outer extremities (K69, K97, K99) of the two long loops EL2 and EL3.

Notable spectral differences are also observed for sites deeper in the transmembrane  $\beta$ -barrel (G9, G89, D132, G151, G153) and the intracellular turns (R80, I81, F123, N124). This observation suggests that the entire Ail  $\beta$ -barrel senses the physical-chemical properties of its membrane environment. The results are in line with our recent MD simulations and mutagenesis data [14], showing that specific interactions of the outer membrane LPS with cluster I and cluster II sites enhance the conformational order of Ail, while Ail dampens LPS dynamics and causes an overall thickening of the outer membrane around its  $\beta$ -barrel. Mutations in the Ail binding sites for LPS reduce *Y. pestis* survival in serum, enhances antibiotic susceptibility, and compromises cell envelope integrity.

To further examine the side chain conformations of Ail in the bacterial cell envelope, we acquired a 2D  $^{13}\text{C}/^{13}\text{C}$  PDS spectrum with 50 ms mixing at 750 MHz (Fig. 3). The spectrum, obtained in 25 hours, has excellent resolution. The overall pattern of cross peaks is conserved between bacterial cell envelope and liposome preparations, indicating that the side chain conformations are broadly similar. Resolved signals from Ala, Ile, Pro, Ser, Thr and Val spin systems can be easily identified based on their chemical shifts, which reflect the  $\beta$ -barrel structure of Ail, and 54 intra-residue cross-peaks can be assigned by direct transfer from the liposome NMR data which was assigned previously [18].

The PDS spectrum also contains signals from non-Ail cell envelope components, including lipids, LPS and peptidoglycan, which make up a large proportion of the bacterial cell mass and incorporate  $^{13}\text{C}$  even with the use of rifampicin, due to relatively fast doubling time of *E. coli* cells and the lag time between IPTG induction

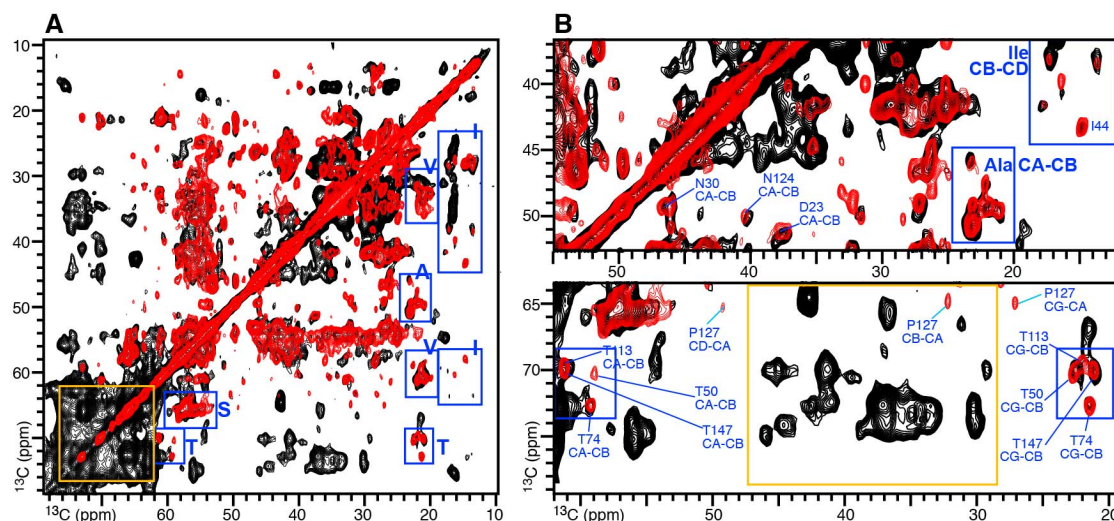

**Figure 3. Solid-state  $^{13}\text{C}/^{13}\text{C}$  PDSD NMR spectra of  $^{15}\text{N}/^{13}\text{C}$ -Ail in *E. coli* cell envelopes.** Resolvable signals from Ala Ile, Ser, Thr, and Val residues of Ail (blue) and non-Ail bacterial cell envelope components (gold) are marked. **(A)** Aliphatic region of the 2D spectra from *E. coli* cell envelopes (black) or reconstituted liposomes (red). Spectra were recorded at 750 MHz, 7°C, with a MAS rate of 11 kHz, 204 t1 increments and 304 transients for the cell envelope sample, or 512 t1 increments and 64 transients for the liposome sample. **(B)** Expanded spectral regions.

175 and rifampicin addition. These may be assigned to outer membrane lipids and LPS molecules or inner  
 176 membrane and peptidoglycan molecules by comparison with the PDSD spectrum acquired for an outer  
 177 membrane preparation of Ail from C41(DE3) *E. coli* (Fig. S4). Treatment with cerulenin, an inhibitor of fatty  
 178 acid biosynthesis has been used to inhibit  $^{13}\text{C}$  labeling of *E. coli* lipids and simplify  $^{13}\text{C}/^{13}\text{C}$  correlation spectra  
 179 of proteins [21]. Moreover, spectroscopic approaches have been developed to silence lipid signals based on  
 180  $^{15}\text{N}$ -filtering [36], and NMR data acquisition above the gel-to-liquid phase transition of the lipids has also been  
 181 shown to suppress lipid signal intensity [41]. These cell envelope signals, however, also present an opportunity  
 182 to probe specific interactions of Ail with the cell envelope.

183 **Emergence of *Y. pestis* phenotypes in *E. coli* through Ail expression.** One important advantage of *in-situ*  
 184 NMR spectroscopy is the ability to probe the structural underpinnings of biology by assaying protein activity  
 185 in the same samples that are analyzed by high resolution spectroscopy. Having confirmed the structural integrity  
 186 of Ail expressed in *E. coli* cells, we asked whether Ail also presents its characteristic virulence phenotypes  
 187 observed in *Y. pestis*.

188 The role of Ail in providing serum resistance to *Y. pestis* is well known, and expression of Ail in *E. coli* DH5 $\alpha$   
 189 cells is sufficient to render them immune to serum mediated killing [42]. Similarly, we found that Ail(+) Lemo-  
 190 21(DE3) cells, expressing plasmid-encoded Ail, exhibit  $87 \pm 7\%$  survival after incubation with normal human  
 191 serum (NHS) relative to heat-inactivated serum (HIS). By contrast, Ail(−) cells, transformed with empty  
 192 plasmid, formed no colonies after incubation with NHS (Fig. 4A).

193 Ail is also known to promote bacterial cell auto-aggregation, pellicle formation and flocculent bacterial growth  
 194 [43], three phenotypes that are associated with virulence in *Y. pestis* strains and many other microbial  
 195 pathogens. In the case of Ail, this property is thought to be related to the distribution of charged amino acids in  
 196 its extracellular loops. Notably, Ail(+) Lemo21(DE3) cells displayed marked auto-aggregation, and formed a  
 197 pellicle at the air-liquid interface that can be readily visualized by staining with crystal violet (Fig. 4B). By  
 198 contrast, neither Ail(−) or native non-transformed cells formed pellicles.

199 Finally we tested the ability of Ail(+) Lemo-21(DE3) cells to bind known ligands of Ail. Previous studies have  
 200 shown that *Y. pestis* requires Ail to associate with many human host proteins, including fibronectin [44], C4BP

[45], and vitronectin (Vn) [42,46]. Incubation of Ail(+) cells with either NHS, purified full-length Vn, or purified Vn-HX – corresponding to the hemopexin-like (HX) domain of Vn – resulted in Vn co-sedimentation in all three cases (Fig. 4C). By contrast, no co-sedimentation was observed for either Ail(–) cells or Ail(+) cells incubated with HIS where Vn is denatured by heat treatment [42]. We conclude that Ail confers specific virulence-related *Y. pestis* phenotypes to Lemo21(DE3) cells. Notably, this implies that the samples for structural analysis are taken from a biologically active cellular system.

**Interaction of Ail with human serum components.** Identifying specific Ail sites involved in serum resistance is of high biomedical importance. To reconstitute the host-pathogen interface that exists when *Y. pestis* enters the blood stream and study this micro-environment at atomic resolution, we incubated Ail(+) cell envelopes with NHS, washed extensively with buffer to eliminate non-specific binding, and then transferred the sample to the NMR rotor for spectroscopic analysis. Incubation with NHS produced several chemical shift perturbations in the  $^1\text{H}/^{15}\text{N}$  spectrum of Ail (Fig. 4D, E; Fig. S).

Ail is known to bind at least two serum components C4BP [42,45] and Vn [42,46]. While additional studies with purified Ail ligands will be needed to assign the observed perturbations to specific serum molecules, it is

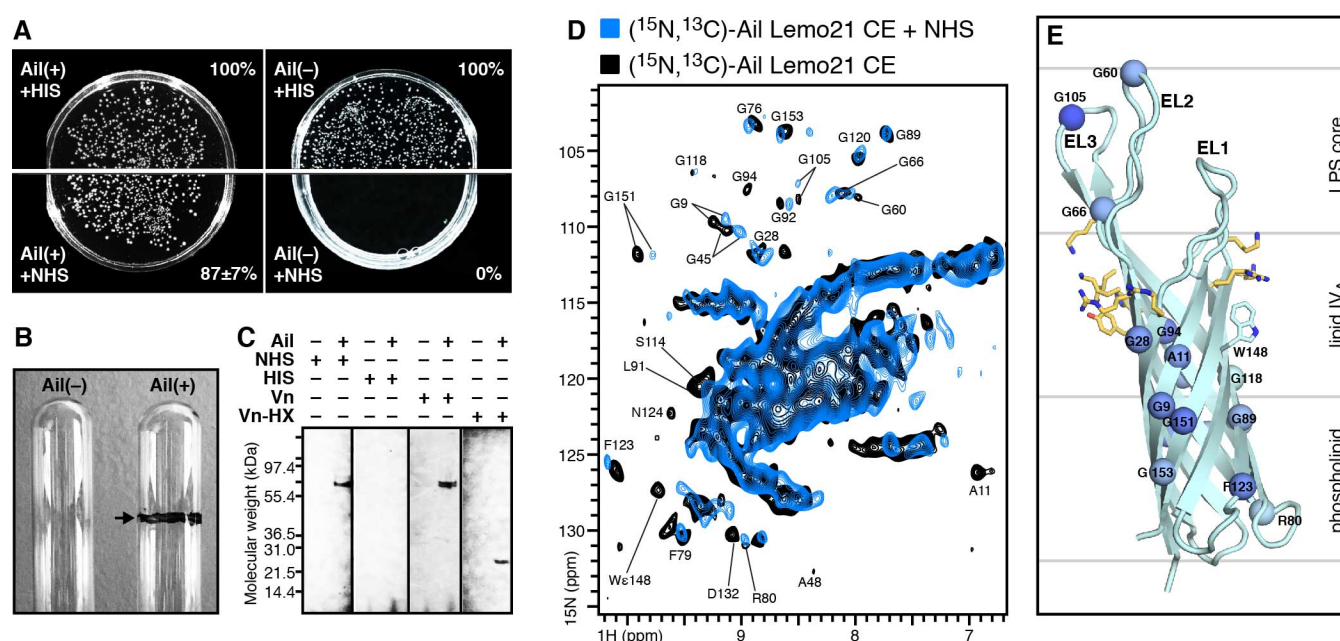

**Figure 4. *Y. pestis* phenotypes induced in *E. coli* by Ail expression and interaction of Ail-expressing *E. coli* cells with human serum.** Assays were performed with *E. coli* Lemo21(DE3) cells transformed with Ail-bearing plasmid, Ail(+), or with empty plasmid, Ail(–). Each data set is representative of at least triplicate experiments. **(A)** Survival of *E. coli* cells in normal human serum (NHS) relative to heat-inactivated serum (HIS) was assayed by incubating cells with either serum, then plating on agar and counting the surviving bacterial colonies. Survival is reported as percent serum resistance relative to the number of surviving colonies in HIS. **(B)** Pellicle formation observed in Ail(+) but not Ail(–) cells. Cells were suspended in 2 mL of M9 minimal media ( $\text{OD}_{600} = 0.5$ , in 15 x 100 mm glass tubes) and incubated for 16 h at 37°C. After removing the cells by centrifugation, the interior glass walls were treated with methanol and air-dried overnight, then washed three times with buffer and air-dried overnight. Finally, the tubes were treated with 2.5 mL of crystal violet solution (0.1% for 10 min) then washed with buffer and air-dried. Pellicle formation is detected as a violet-stained rim at the air-liquid interface (arrow). **(C)** Vn binding activity assayed by co-sedimentation of Ail(+) or Ail(–) bacterial cells, with NHS, HIS, purified full-length Vn, or purified Vn-HX. Immunoblots were probed with anti-Vn or anti-Ail antibodies. **(D)**  $^1\text{H}$ -detected  $^{15}\text{N}$  CP-HSQC solid-state NMR spectra of Ail in *E. coli* cell envelopes acquired before (black) or after (blue) incubation with NHS. Spectra were recorded at 900 MHz, 30°C, with a MAS rate of 57 kHz, and 1,600 (black) or 2048 (blue) transients. **(E)** Structural model of Ail embedded in the *Y. pestis* outer membrane taken from a recent MD simulation [14]. Spheres denote resolved and assigned amide N atoms that undergo  $^1\text{H}/^{15}\text{N}$  chemical shift perturbations from 0 ppm (cyan) to 0.20 ppm (blue), in the presence of NHS. The boundaries of the outer membrane phospholipid and LPS layers are marked.



notable that a few  $^1\text{H}/^{15}\text{N}$  signals are appreciably perturbed. These include signals from G66, G92, G94, residues that localize near F54, F68, S102, and F104 which have been shown to be critical for binding serum Vn and for the serum resistance phenotype [47]. Interestingly, intra-membrane perturbations, near the center of the Ail transmembrane  $\beta$ -barrel, are also observed, indicating that the interactions of serum molecules with the extracellular loops of Ail may relay allosterically to membrane-embedded sites. Moreover, it is possible that the Ail  $\beta$ -barrel senses outer membrane perturbations caused by the association of serum components with the bacterial cell surface.

**Conclusions.** The ability to probe the molecular structure and interactions of Ail in its native cellular environment is critical for gaining mechanistic insights into Ail-mediated pathogenesis and for developing medical countermeasures. Previously, using NMR and MD simulations with artificial membranes of defined molecular composition, we identified specific molecular interactions between Ail and LPS that are important for *Y. pestis* virulence phenotypes [14]. Here, we have shown that Ail and its virulence phenotypes can be expressed in a bacterial outer membrane for parallel, *in situ* microbiology assays and solid-state NMR structural studies with atomic-resolution. These tools allow us to expand the size and complexity of the Ail micro-environment further than previously possible, and identify key residues that are sensitive to both the bacterial membrane environment and the interactions of human serum.

In NMR studies with bacterial cell envelopes, we detect specific Ail signals that firmly establish the sensitivity of the protein's conformation to its micro-environment. Perturbations across distinct topological regions of Ail can be detected as a response to its expression in the asymmetric bacterial outer membrane, and while the overall structure of Ail is unchanged, the native membrane appears to have subtle ordering effects on the extracellular loops. The NMR data further reveal sensitivity of specific Ail sites to serum exposure, and while the identity of the serum components responsible for these effects remains to be determined, human Vn is a good candidate as it is avidly recruited by Ail to the bacterial cell surface. Finally, the NMR data indicate that Ail may sense serum-induced perturbations of the surrounding membrane environment. While the mechanism underlying these observations is unknown, the recruitment of complement components at the cell surface could be responsible for such an effect.

The present results provide a molecular window to the Ail bacterial membrane assembly. They reaffirm the importance of the membrane environment as a key regulator of biological function and underscore the importance of characterizing the native assembly as a whole, rather than its individual components.

244

## 245 MATERIALS AND METHODS

**Expression of Ail in the *E. coli* outer membrane.** The gene encoding mature *Y. pestis* Ail was cloned in the *NcoI* and *XhoI* restriction sites of the *E. coli* plasmid pET-22b(+), downstream of the signal sequence of pectate lyase B [29]. This plasmid was transformed into *E. coli* cells by heat shock and positive clones were selected by plating on LB-agar with ampicillin (100  $\mu\text{g}/\text{mL}$ ) and chloramphenicol (35  $\mu\text{g}/\text{mL}$ ), in the case of Lemo21(DE3) cells. Three *E. coli* cell strains derived from BL21(DE3) [30] were tested: C41(DE3) [31], BL21(DE3) $\Delta\text{ACF}$  [33] and Lemo21(DE3) [32]. Transformed cells were cultured overnight, at 30°C, with vigorous shaking, in 50 mL of M9 minimal media supplemented with Basal Medium Eagle vitamin solution (1% by vol.), ampicillin (100  $\mu\text{g}/\text{mL}$ ), and chloramphenicol (50  $\mu\text{g}/\text{mL}$ ). This overnight culture was used to inoculate 500 mL of fresh M9 media (supplemented as above), and grown from  $\text{OD}_{600} \sim 0.05$  to  $\text{OD}_{600} \sim 0.4$ , at 30°C, at which point the cells were harvested by low-speed centrifugation (5,000 g, 4°C, 20 min) and then resuspended in 500 mL of fresh supplemented M9 media. Protein expression was induced by adding 0.4 mM isopropyl  $\beta$ -D-1-thiogalactopyranoside (IPTG), after which the shaking speed was reduced and the temperature lowered to 25°C. The cells were cultured for 20 min before adding rifampicin (100  $\mu\text{g}/\text{mL}$ ), and then for an additional 20 hours, in the dark. The cells were harvested by low-speed centrifugation, and resuspended in HEPES buffer (10 mM, pH 7.4).



To obtain uniformly  $^{15}\text{N}/^{13}\text{C}$  labeled Ail, the cells were grown in unlabeled M9 media and only transferred to  $^{15}\text{N}/^{13}\text{C}$  labeled M9, prepared with  $(^{15}\text{NH}_4)_2\text{SO}_4$  (1 g/L) and  $^{13}\text{C}_6$ -glucose (5 g/L), before induction with IPTG. To obtain  $^2\text{H}$  labeling of endogenous *E. coli* biomolecules, cells were grown in 100 mL of  $^2\text{H}_2\text{O}$  and then switched to  $\text{H}_2\text{O}$  before induction with IPTG.

**Isolation of bacterial membrane fractions.** Ail-expressing cells were lysed by three passes through a French Press. After removing cellular debris by centrifugation (20,000 g,  $4^\circ\text{C}$ , 1 h), the total cell envelope fraction, including inner and outer membranes, was harvested by ultracentrifugation (100,000 g,  $4^\circ\text{C}$ , 1 h), washed three times with sodium phosphate buffer (20 mM, pH 6.5), and then collected by ultracentrifugation. To further isolate the outer membrane fraction, the total cell envelope was suspended in 7 mL of buffer I (10 mM HEPES, pH 7.4, 3.4 mM N-lauroylsarcosine) and then separated by ultracentrifugation. The supernatant containing detergent-solubilized inner membrane was removed, while the pellet was washed three times with sodium phosphate buffer (20 mM, pH 6.5) and then collected by ultracentrifugation. All three fractions – total cell envelope, inner membrane and outer membrane – were analyzed by polyacrylamide gel electrophoresis (PAGE) in sodium dodecyl sulfate (SDS), and immune-blotting with the  $\alpha$ -Ail-EL2 antibody [17].

**NMR sample preparation.** Samples for solid-state NMR studies were packed into a 3.2 mm or 1.3 mm magic angle spinning (MAS) rotor. For samples incubated with human serum (NHS or HIS), isolated cell envelopes expressing  $^{13}\text{C}/^{15}\text{N}$  Ail were suspended in 7 mL of serum and gently mixed for 4 h, at room temperature, before harvesting and washing with sodium phosphate buffer by ultracentrifugation and packing into the MAS rotor. The preparation of Ail liposome samples has been described [18].

**Solid-state NMR spectroscopy.** Solid-state NMR experiments with  $^{13}\text{C}$  detection were performed on a 750 MHz Bruker Avance III HD spectrometer, equipped with a Bruker 3.2 mm  $^1\text{H}/^{13}\text{C}/^{15}\text{N}$  E-free MAS probe operating at a sample temperature of  $7 \pm 5^\circ\text{C}$ , with a spin rate of 11,111 Hz. Typical  $\pi/2$  pulse lengths for  $^1\text{H}$ ,  $^{13}\text{C}$  and  $^{15}\text{N}$  were 2.5  $\mu\text{s}$ , 2.5  $\mu\text{s}$ , and 5  $\mu\text{s}$ , respectively.  $^1\text{H}$  decoupling was implemented with the SPINAL64 sequence, with a radio frequency (RF) field strength of 90 kHz during acquisition. Two-dimensional  $^{15}\text{N}/^{13}\text{C}$  NCA spectra were acquired using the SPECIFIC-CP pulse program, with contact times of 2 ms and a 70-100% ramp, for  $^1\text{H}/^{15}\text{N}$  cross polarization (CP), and 4.9 ms for  $^{15}\text{N}/^{13}\text{C}$  CP. Two-dimensional  $^{13}\text{C}$ - $^{13}\text{C}$  PDS (proton driven spin diffusion) spectra were acquired with a  $^1\text{H}$ - $^{13}\text{C}$  contact time of 1 ms, a  $^{13}\text{C}$ - $^{13}\text{C}$  mixing time of 50 ms, and 20 ms of SWf-TPPM  $^1\text{H}$  decoupling. Experiments with  $^1\text{H}$  detection were performed on a 900 MHz Bruker Avance III HD spectrometer equipped with a Bruker 1.3 mm MAS probe, operating at an effective sample temperature of  $30 \pm 5^\circ\text{C}$ , with a spin rate of  $57,000 \pm 15$  Hz. Two-dimensional  $^1\text{H}/^{15}\text{N}$  CP-HSQC spectra were acquired as described previously [18], using the MISSISSIPPI sequence [48] for water suppression.

**Bacterial cell assays.** *E. coli* Lemo21(DE3) cells transformed with Ail-expressing plasmid pET-22b(+) or with empty plasmid were cultured as described above, then harvested by low-speed centrifugation, washed twice in ice-cold phosphate buffer saline (PBS), and resuspended in ice-cold PBS to  $\text{OD}_{600}=1.0$ .

To assay binding to human Vn, washed bacteria (250  $\mu\text{L}$ ) were added to an equal volume of either NHS (Sigma-Aldrich H4522), HIS (Sigma-Aldrich H3667), purified full-length Vn (1  $\mu\text{M}$  in PBS; Sigma-Aldrich SRP3186), or purified Vn-HX (2  $\mu\text{M}$  in PBS) prepared as described [46]. The binding reactions were incubated for 30 min at  $37^\circ\text{C}$ , then placed on ice. Bacterial cells and bound proteins were then collected by centrifugation (6,000 g, 5 min,  $4^\circ\text{C}$ ), washed three times with 1 mL of ice-cold PBS containing 0.1% Tween-20, and lysed by boiling in 100  $\mu\text{L}$  of SDS-PAGE sample buffer (50 mM Tris-HCl, 2% SDS, 5% glycerol, 1%  $\beta$ -mercaptoethanol, pH 6.8). Bacterial cell lysates and co-sedimented proteins were subjected to SDS-PAGE and immunoblot analysis with rabbit polyclonal anti-Vn (R12-2413, Assay Biotech) and anti-Ail-EL2 [42] antibodies.

To assay serum resistance, *E. coli* cells collected after incubation with NHS or HIS were diluted 100-fold with PBS, and 25  $\mu\text{L}$  of this dilution mixture were plated on LB-agar supplemented with ampicillin (100  $\mu\text{g}/\text{mL}$ ) and chloramphenicol (35  $\mu\text{g}/\text{mL}$ ). After incubating overnight at  $37^\circ\text{C}$  overnight, the percentage of cell survival was estimated by counting the number of bacterial colonies present on each plate, using ImageJ [49]. The

percent survival represents the number of colonies that survive in NHS divided by the number that survive in HIS.

To assay pellicle formation, *E. coli* cells were harvested, then resuspended in 2 mL of M9 minimal media to OD<sub>600</sub> = 0.5 in 15 x 100 mm glass tubes, and incubated for 16 h at 37°C. After removing the cells by centrifugation, the interior glass walls were treated with methanol and air-dried overnight, then washed three times with PBS and again air-dried overnight. The tubes were treated with 2.5 mL of crystal violet solution (0.1 %) for 10 min, then washed with PBS and air-dried. Pellicle formation was detected qualitatively as a violet-stained rim at the air-liquid interface.

**Acknowledgements:** This study was supported by grants from the National Institutes of Health (GM 118186, GM 122501, AI130009 and P41 EB 002031) and a postdoctoral fellowship from Canadian Institutes of Health Research (to KS).

**Supporting Information:** This article contains supporting information online.

**Author Contributions:** JEK, LMF, KS, CS, YY and SP: experiment execution  
JEK, SJO, GVP, FMM: research design; data analysis; writing and editing

**Competing Interests:** Authors declare no competing interests.

**Data Availability:** All data needed are present in the paper and/or the Supplementary Materials. Additional information is available upon request.

## REFERENCES

1. Perry RD, Fetherston JD (1997) **Yersinia pestis--etiologic agent of plague.** *Clin. Microbiol. Rev.* 10, 35-66 (172914).
2. Parkhill J, Wren BW, Thomson NR, Titball RW, Holden MT, Prentice MB, Sebahia M, James KD, Churcher C, Mungall KL, Baker S, Basham D, Bentley SD, Brooks K, Cerdeno-Tarraga AM, Chillingworth T, Cronin A, Davies RM, Davis P, Dougan G, Feltwell T, Hamlin N, Holroyd S, Jagels K, Karlyshev AV, Leather S, Moule S, Oyston PC, Quail M, Rutherford K, Simmonds M, Skelton J, Stevens K, Whitehead S, Barrell BG (2001) **Genome sequence of Yersinia pestis, the causative agent of plague.** *Nature* 413, 523-527
3. Deng W, Burland V, Plunkett G, 3rd, Boutin A, Mayhew GF, Liss P, Perna NT, Rose DJ, Mau B, Zhou S, Schwartz DC, Fetherston JD, Lindler LE, Brubaker RR, Plano GV, Straley SC, McDonough KA, Nilles ML, Matson JS, Blattner FR, Perry RD (2002) **Genome sequence of Yersinia pestis KIM.** *J. Bacteriol.* 184, 4601-4611 (135232).
4. Knirel YA, Anisimov AP (2012) **Lipopolysaccharide of Yersinia pestis, the Cause of Plague: Structure, Genetics, Biological Properties.** *Acta Naturae* 4, 46-58 (PMC3492934).
5. Miller VL, Bliska JB, Falkow S (1990) **Nucleotide sequence of the Yersinia enterocolitica ail gene and characterization of the Ail protein product.** *J. Bacteriol.* 172, 1062-1069

- 348 6. Kolodziejek AM, Schnider DR, Rohde HN, Wojtowicz AJ, Bohach GA, Minnich SA, Hovde CJ (2010) **Outer membrane protein**  
349 **X (Ail) contributes to Yersinia pestis virulence in pneumonic plague and its activity is dependent on the**  
350 **lipopolysaccharide core length.** *Infect Immun* 78, 5233-5243 (2981323).
- 351 7. Hinnebusch BJ, Jarrett CO, Callison JA, Gardner D, Buchanan SK, Plano GV (2011) **Role of the Yersinia pestis Ail protein in**  
352 **preventing a protective polymorphonuclear leukocyte response during bubonic plague.** *Infect Immun* 79, 4984-4989  
353 (PMC3232667).
- 354 8. Hinnebusch BJ, Jarrett CO, Bland DM (2017) **"Fleaing" the Plague: Adaptations of Yersinia pestis to Its Insect Vector That**  
355 **Lead to Transmission.** *Annu. Rev. Microbiol.* 71, 215-232
- 356 9. Bartra SS, Styer KL, O'Bryant DM, Nilles ML, Hinnebusch BJ, Aballay A, Plano GV (2008) **Resistance of Yersinia pestis to**  
357 **complement-dependent killing is mediated by the Ail outer membrane protein.** *Infection and Immunity* 76, 612-622  
358 (2223467).
- 359 10. Felek S, Krukonis ES (2009) **The Yersinia pestis Ail protein mediates binding and Yop delivery to host cells required for**  
360 **plague virulence.** *Infection and Immunity* 77, 825-836 (2632051).
- 361 11. Kolodziejek AM, Hovde CJ, Minnich SA (2012) **Yersinia pestis Ail: multiple roles of a single protein.** *Front Cell Infect Microbiol*  
362 2, 103 (PMC3417512).
- 363 12. Knirel YA, Dentovskaya SV, Bystrova OV, Kocharova NA, Senchenkova SN, Shaikhutdinova RZ, Titareva GM, Bakhteeva IV,  
364 Lindner B, Pier GB, Anisimov AP (2007) **Relationship of the lipopolysaccharide structure of Yersinia pestis to resistance**  
365 **to antimicrobial factors.** *Advances in Experimental Medicine and Biology* 603, 88-96
- 366 13. Felek S, Muszynski A, Carlson RW, Tsang TM, Hinnebusch BJ, Krukonis ES (2010) **Phosphoglucosyltransferase of Yersinia pestis**  
367 **is required for autoaggregation and polymyxin B resistance.** *Infection and Immunity* 78, 1163-1175 (2825912).
- 368 14. Singh C, Lee H, Tian Y, Schesser Bartra S, Hower S, Fujimoto LM, Yao Y, Ivanov SA, Shaikhutdinova RZ, Anisimov AP, Plano  
369 GV, Im W, Marassi FM (2020) **Mutually constructive roles of Ail and LPS in Yersinia pestis serum survival.** *Mol. Microbiol.*  
370 114, 510-520 Journal cover.
- 371 15. Yamashita S, Lukacik P, Barnard TJ, Noinaj N, Felek S, Tsang TM, Krukonis ES, Hinnebusch BJ, Buchanan SK (2011) **Structural**  
372 **insights into Ail-mediated adhesion in Yersinia pestis.** *Structure* 19, 1672-1682 (3217190).
- 373 16. Marassi FM, Ding Y, Schwieters CD, Tian Y, Yao Y (2015) **Backbone structure of Yersinia pestis Ail determined in micelles**  
374 **by NMR-restrained simulated annealing with implicit membrane solvation.** *J. Biomol. NMR* 63, 59-65 (PMC4577439).
- 375 17. Ding Y, Fujimoto LM, Yao Y, Plano GV, Marassi FM (2015) **Influence of the lipid membrane environment on structure and**  
376 **activity of the outer membrane protein Ail from Yersinia pestis.** *Biochim Biophys Acta* 1848, 712-720 (PMC4281492).
- 377 18. Yao Y, Dutta SK, Park SH, Rai R, Fujimoto LM, Bobkov AA, Opella SJ, Marassi FM (2017) **High resolution solid-state NMR**  
378 **spectroscopy of the Yersinia pestis outer membrane protein Ail in lipid membranes.** *J. Biomol. NMR* 67, 179-190  
379 (PMC5490241).
- 380 19. Dutta SK, Yao Y, Marassi FM (2017) **Structural Insights into the Yersinia pestis Outer Membrane Protein Ail in Lipid**  
381 **Bilayers.** *J Phys Chem B* 121, 7561-7570 (PMC5713880).
- 382 20. Serber Z, Corsini L, Durst F, Dotsch V (2005) **In-cell NMR spectroscopy.** *Methods Enzymol.* 394, 17-41
- 383 21. Mao L, Inoue K, Tao Y, Montelione GT, McDermott AE, Inouye M (2011) **Suppression of phospholipid biosynthesis by**  
384 **cerulenin in the condensed Single-Protein-Production (cSPP) system.** *J. Biomol. NMR* 49, 131-137 (3164850).
- 385 22. Renault M, Tommassen-van Boxtel R, Bos MP, Post JA, Tommassen J, Baldus M (2012) **Cellular solid-state nuclear magnetic**  
386 **resonance spectroscopy.** *Proc. Natl. Acad. Sci. U. S. A.* 109, 4863-4868 (3323964).
- 387 23. Baker LA, Folkers GE, Sinnige T, Houben K, Kaplan M, van der Cruysen EA, Baldus M (2015) **Magic-angle-spinning solid-**  
388 **state NMR of membrane proteins.** *Methods Enzymol.* 557, 307-328
- 389 24. Luchinat E, Banci L (2018) **In-Cell NMR in Human Cells: Direct Protein Expression Allows Structural Studies of Protein**  
390 **Folding and Maturation.** *Acc. Chem. Res.* 51, 1550-1557



- 391 25. Fu R, Wang X, Li C, Santiago-Miranda AN, Pielak GJ, Tian F (2011) **In situ structural characterization of a recombinant**  
392 **protein in native Escherichia coli membranes with solid-state magic-angle-spinning NMR.** *J. Am. Chem. Soc.* 133, 12370-  
393 12373 (PMC3154996).
- 394 26. Anisimov AP, Shaikhutdinova RZ, Pan'kina LN, Feodorova VA, Savostina EP, Bystrova OV, Lindner B, Mokrievich AN, Bakhteeva  
395 IV, Titareva GM, Dentovskaya SV, Kocharova NA, Senchenkova SN, Holst O, Devdariani ZL, Popov YA, Pier GB, Knirel YA  
396 (2007) **Effect of deletion of the lpxM gene on virulence and vaccine potential of Yersinia pestis in mice.** *J. Med. Microbiol.*  
397 56, 443-453
- 398 27. Sebbane F, Lemaitre N, Sturdevant DE, Rebeil R, Virtaneva K, Porcella SF, Hinnebusch BJ (2006) **Adaptive response of**  
399 **Yersinia pestis to extracellular effectors of innate immunity during bubonic plague.** *Proc. Natl. Acad. Sci. U. S. A.* 103,  
400 11766-11771 (PMC1518801).
- 401 28. Chauvaux S, Dillies MA, Marceau M, Rosso ML, Rousseau S, Moszer I, Simonet M, Carniel E (2011) **In silico comparison of**  
402 **Yersinia pestis and Yersinia pseudotuberculosis transcriptomes reveals a higher expression level of crucial virulence**  
403 **determinants in the plague bacillus.** *Int. J. Med. Microbiol.* 301, 105-116
- 404 29. Sockolovsky JT, Szoka FC (2013) **Periplasmic production via the pET expression system of soluble, bioactive human**  
405 **growth hormone.** *Protein Expr. Purif.* 87, 129-135 (PMC3537859).
- 406 30. Studier FW, Moffatt BA (1986) **Use of bacteriophage T7 RNA polymerase to direct selective high-level expression of cloned**  
407 **genes.** *PG - 113-30. J. Mol. Biol.* 189
- 408 31. Miroux B, Walker JE (1996) **Over-production of proteins in Escherichia coli: mutant hosts that allow synthesis of some**  
409 **membrane proteins and globular proteins at high levels.** *J. Mol. Biol.* 260, 289-298
- 410 32. Wagner S, Klepsch MM, Schlegel S, Appel A, Draheim R, Tarry M, Hogbom M, van Wijk KJ, Slotboom DJ, Persson JO, de Gier  
411 JW (2008) **Tuning Escherichia coli for membrane protein overexpression.** *Proc. Natl. Acad. Sci. U. S. A.* 105, 14371-14376  
412 (PMC2567230).
- 413 33. Meuskens I, Michalik M, Chauhan N, Linke D, Leo JC (2017) **A New Strain Collection for Improved Expression of Outer**  
414 **Membrane Proteins.** *Front Cell Infect Microbiol* 7, 464 (PMC5681912).
- 415 34. Hartmann G, Honikel KO, Knusel F, Nuesch J (1967) **The specific inhibition of the DNA-directed RNA synthesis by**  
416 **rifamycin.** *Biochim Biophys Acta* 145, 843-844
- 417 35. Almeida FC, Amorim GC, Moreau VH, Sousa VO, Creazola AT, Americo TA, Pais AP, Leite A, Netto LE, Giordano RJ, Valente  
418 AP (2001) **Selectively labeling the heterologous protein in Escherichia coli for NMR studies: a strategy to speed up NMR**  
419 **spectroscopy.** *J Magn Reson* 148, 142-146
- 420 36. Baker LA, Daniels M, van der Cruysen EA, Folkers GE, Baldus M (2015) **Efficient cellular solid-state NMR of membrane**  
421 **proteins by targeted protein labeling.** *J. Biomol. NMR* 62, 199-208 (PMC4451474).
- 422 37. Zhou HX, Cross TA (2013) **Influences of membrane mimetic environments on membrane protein structures.** *Annu Rev*  
423 *Biophys* 42, 361-392 (3731949).
- 424 38. Chipot C, Dehez F, Schnell JR, Zitzmann N, Pebay-Peyroula E, Catoire LJ, Miroux B, Kunji ERS, Veglia G, Cross TA, Schanda  
425 P (2018) **Perturbations of Native Membrane Protein Structure in Alkyl Phosphocholine Detergents: A Critical Assessment**  
426 **of NMR and Biophysical Studies.** *Chem. Rev.* 118, 3559-3607 (PMC5896743).
- 427 39. Williamson MP (2013) **Using chemical shift perturbation to characterise ligand binding.** *Prog. Nucl. Magn. Reson. Spectrosc.*  
428 73, 1-16
- 429 40. Baker LA, Sinnige T, Schellenberger P, de Keyser J, Siebert CA, Driessen AJM, Baldus M, Grunewald K (2018) **Combined (1)H-**  
430 **Detected Solid-State NMR Spectroscopy and Electron Cryotomography to Study Membrane Proteins across Resolutions**  
431 **in Native Environments.** *Structure* 26, 161-170 e163 (PMC5758107).
- 432 41. Shahid SA, Nagaraj M, Chauhan N, Franks TW, Bardiaux B, Habeck M, Orwick-Rydmark M, Linke D, van Rossum BJ (2015)  
433 **Solid-state NMR Study of the YadA Membrane-Anchored Domain in the Bacterial Outer Membrane.** *Angew. Chem. Int. Ed.*  
434 *Engl.* 54, 12602-12606
- 435 42. Bartra SS, Ding Y, Miya Fujimoto L, Ring JG, Jain V, Ram S, Marassi FM, Plano GV (2015) **Yersinia pestis uses the Ail outer**  
436 **membrane protein to recruit vitronectin.** *Microbiology* 161, 2174-2183 (PMC4806588). Editor's Choice.

437 43. Kolodziejek AM, Sinclair DJ, Seo KS, Schnider DR, Deobald CF, Rohde HN, Viall AK, Minnich SS, Hovde CJ, Minnich SA, Bohach  
438 GA (2007) **Phenotypic characterization of OmpX, an Ail homologue of Yersinia pestis KIM.** *Microbiology* 153, 2941-2951

439 44. Tsang TM, Felek S, Krukonis ES (2010) **Ail binding to fibronectin facilitates Yersinia pestis binding to host cells and Yop**  
440 **delivery.** *Infection and Immunity* 78, 3358-3368 (2916272).

441 45. Ho DK, Skurnik M, Blom AM, Meri S (2014) **Yersinia pestis Ail recruitment of C4b-binding protein leads to factor I-mediated**  
442 **inactivation of covalently and noncovalently bound C4b.** *Eur. J. Immunol.* 44, 742-751

443 46. Shin K, Lechtenberg BC, Fujimoto LM, Yao Y, Bartra SS, Plano GV, Marassi FM (2019) **Structure of human Vitronectin C-**  
444 **terminal domain and interaction with Yersinia pestis outer membrane protein Ail.** *Sci Adv* 5, eaax5068 (PMC6739113).

445 47. Thomson JJ, Plecha SC, Krukonis ES (2019) **Ail provides multiple mechanisms of serum resistance to Yersinia pestis.** *Mol.*  
446 *Microbiol.* 111, 82-95 (PMC6351204).

447 48. Zhou DH, Rienstra CM (2008) **High-performance solvent suppression for proton detected solid-state NMR.** *J Magn Reson*  
448 192, 167-172 (2443633).

449 49. Schneider CA, Rasband WS, Eliceiri KW (2012) **NIH Image to ImageJ: 25 years of image analysis.** *Nat Methods* 9, 671-675  
450 (PMC5554542).  
451
