# Supplementary material for: Correlating the structure and activity of Y. pestis Ail in a bacterial cell envelope
Source: bioRxiv or medRxiv preprint supplement (doi:10.1101/2020.09.23.310672), 2020-12-08
Supplement: Supplementary file [file media-1.pdf]

## Supplementary Information

### **Resolving atomic site interactions of the *Y. pestis* outer membrane protein Ail with human serum in the bacterial cell envelope**

James E. Kent <sup>a</sup>, Lynn M. Fujimoto <sup>a</sup>, Kyungsoo Shin <sup>a</sup>, Chandan Singh <sup>a,d</sup>, Yong Yao <sup>a</sup>, Sang Ho Park <sup>b</sup>, Stanley J. Opella <sup>b</sup>, Gregory V. Plano <sup>c</sup>, and Francesca M. Marassi <sup>a\*</sup>

<sup>a</sup>Cancer Center, Sanford Burnham Prebys Medical Discovery Institute, 10901 North Torrey Pines Road, La Jolla CA, 92037, USA.

<sup>b</sup>Department of Chemistry and Biochemistry University of California San Diego, La Jolla, CA, 92037, USA.

<sup>c</sup>Department of Microbiology and Immunology, University of Miami Miller School of Medicine, Miami, FL 33101, USA

<sup>d</sup>Present address: Department of Biochemistry, Institute of Science, Banaras Hindu University (BHU), Varanasi, Pin-221005

\*Corresponding author: [fmarassi@sbp.edu](mailto:fmarassi@sbp.edu)

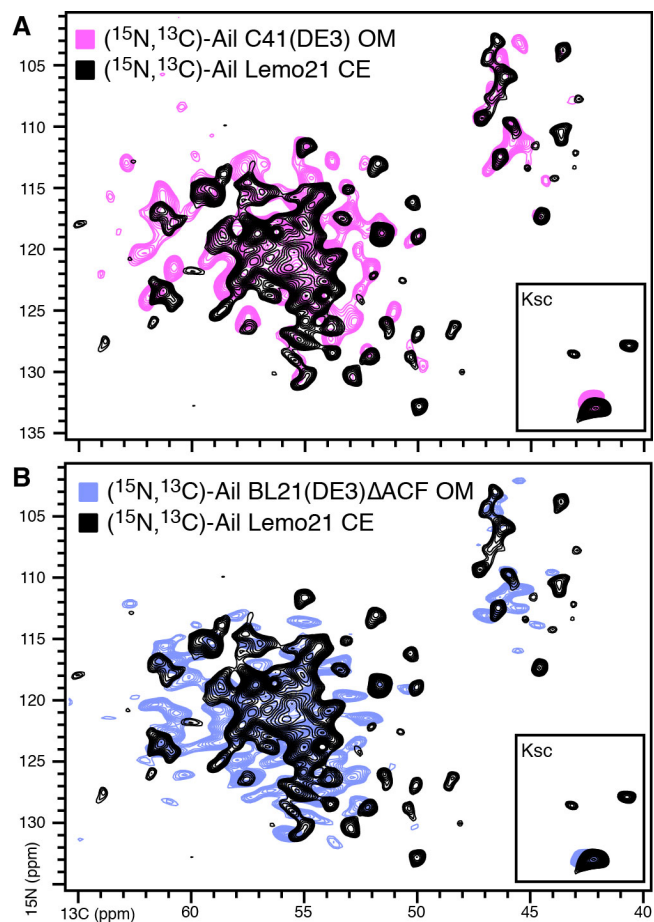

**Figure S1. 2D  $^{15}\text{N}/^{13}\text{C}$  NCA solid-state NMR spectra of Ail in *E. coli* cell envelopes (CE), *E. coli* outer membranes (OM) and liposomes. (A, B) NMR spectra were acquired for  $^{15}\text{N}, ^{13}\text{C}$ -Ail in *E. coli* CE from Lemo21(DE3) cells (black) or *E. coli* OM from C41(DE3) cells (pink), *E. coli* OM from BL21(DE3) $\Delta$ ACF cells (violet). NMR spectra were recorded at 750 MHz, 7°C, with a MAS rate of 11 kHz. Inset box denotes folded-in peaks from Lys side chains (Ksc).**

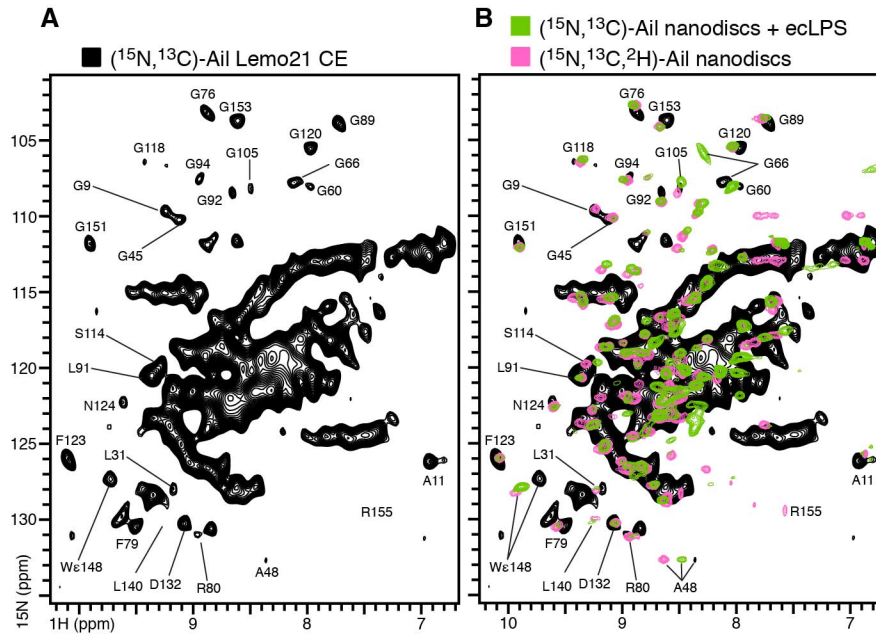

**Figure S2. Solid-state NMR CP-HSQC and solution NMR HSQC  $^1\text{H}/^{15}\text{N}$  2D spectra of Ail in *E. coli* cell envelopes (CE) and nanodiscs.** Solid-state NMR CP-HSQC spectra (black) were acquired for  $(^{15}\text{N}, ^{13}\text{C})$ -Ail in *E. coli* CE from Lemo21(DE3) cells, at 900 MHz, 30°C, with a MAS rate of 60 kHz and 1,600 transients. Solution NMR HSQC spectra were acquired for purified Ail uniformly labeled with  $^{15}\text{N}$ ,  $^{13}\text{C}$  and  $^2\text{H}$  in lipid nanodiscs (pink), or uniformly labeled with  $^{15}\text{N}$  and  $^{13}\text{C}$  in nanodiscs reconstituted with *E. coli* rough-type LPS (green). The solution NMR spectra of Ail nanodiscs have been described previously [14, 19]

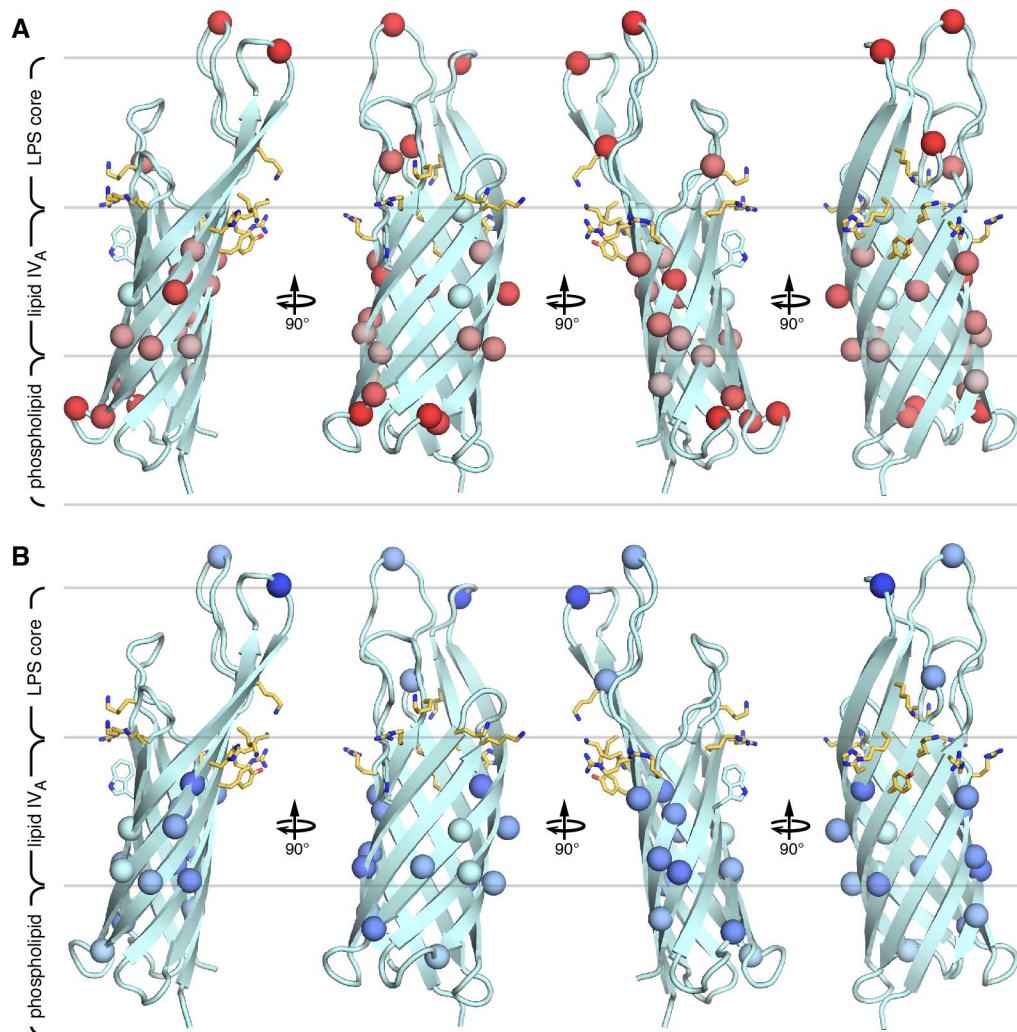

**Figure S3. Structural model of Ail embedded in the *Y. pestis* outer membrane showing perturbations associated with the cell envelope environment or interactions with NHS.** Sidechains forming two clusters of LPS-recognition motifs are shown as yellow sticks. The boundaries of the outer membrane phospholipid and LPS layers are marked (gray lines). Residue numbers, from E1 to F156, corresponds to the mature sequence of Ail. **(A)** Spheres denote resolved and assigned amide N atoms that undergo  $^1\text{H}/^{15}\text{N}$  chemical shift perturbations from 0 ppm (cyan) to 0.15 ppm (red), between the cell envelope and liposome environments. **(B)** Spheres denote resolved and assigned amide N atoms that undergo  $^1\text{H}/^{15}\text{N}$  chemical shift perturbations from 0 ppm (cyan) to 0.20 ppm (blue), in the presence of NHS.

**Table S1.** Resolved  $^1\text{H}/^{15}\text{N}$  NMR signals with tentative assignments derived by spectral comparison with the solid-state and solution NMR spectra of purified Ail reconstituted in liposomes or nanodiscs (18, 19). Missing peaks are denoted by the letter "X". The combined difference ( $\Delta\text{HN}$ ) of amide  $^1\text{H}$  and  $^{15}\text{N}$  chemical shifts was calculated as:  $\Delta\text{HN} = [(\Delta\text{H})^2 + (\Delta\text{N}/5)^2]^{1/2}$ .

18. Yao Y, Dutta SK, Park SH, Rai R, Fujimoto LM, Bobkov AA, Opella SJ, Marassi FM (2017) **High resolution solid-state NMR spectroscopy of the Yersinia pestis outer membrane protein Ail in lipid membranes.** *J Biomol NMR* 67, 179-190 (PMC5490241).

19. Dutta SK, Yao Y, Marassi FM (2017) **Structural Insights into the Yersinia pestis Outer Membrane Protein Ail in Lipid Bilayers.** *J Phys Chem B* 121, 7561-7570 (PMC5713880).

| Ail residue | liposomes          |                       | CE                 |                       | CE + NHS           |                       | lipo <u>VS</u> CE       | CE $\pm$ NHS            |
|-------------|--------------------|-----------------------|--------------------|-----------------------|--------------------|-----------------------|-------------------------|-------------------------|
|             | $^1\text{H}$ (ppm) | $^{15}\text{N}$ (ppm) | $^1\text{H}$ (ppm) | $^{15}\text{N}$ (ppm) | $^1\text{H}$ (ppm) | $^{15}\text{N}$ (ppm) | $\Delta\text{HN}$ (ppm) | $\Delta\text{HN}$ (ppm) |
| <b>9G</b>   | 9.139              | 109.788               | 9.229              | 109.669               | 9.123              | 109.485               | 0.093                   | 0.113                   |
| <b>11A</b>  | 6.849              | 126.575               | 6.931              | 126.083               | 6.847              | 126.337               | 0.128                   | 0.098                   |
| <b>23D</b>  | 8.141              | 114.416               | 8.213              | 114.070               | 8.184              | 114.713               | 0.100                   | 0.132                   |
| <b>28G</b>  | 8.736              | 111.021               | 8.809              | 111.373               | 8.731              | 111.717               | 0.101                   | 0.104                   |
| <b>45G</b>  | 9.071              | 110.066               | 9.115              | 110.230               | 9.000              | 110.325               | 0.055                   | 0.116                   |
| <b>48A</b>  | 8.324              | 132.972               | 8.358              | 132.585               | X                  | X                     | 0.085                   | —                       |
| <b>60G</b>  | X                  | X                     | 7.966              | 108.059               | 8.035              | 107.870               | —                       | 0.078                   |
| <b>66G</b>  | X                  | X                     | 8.110              | 107.786               | 8.186              | 107.972               | —                       | 0.085                   |
| <b>76G</b>  | 8.852              | 102.744               | 8.874              | 103.164               | 8.921              | 103.362               | 0.087                   | 0.061                   |
| <b>80R</b>  | 8.810              | 131.135               | 8.833              | 130.502               | 8.800              | 130.396               | 0.129                   | 0.039                   |
| <b>81I</b>  | 8.194              | 126.515               | X                  | x                     | X                  | X                     | —                       | —                       |
| <b>82N</b>  | 7.837              | 112.360               | X                  | x                     | X                  | X                     | —                       | —                       |
| <b>89G</b>  | 7.709              | 103.532               | 7.714              | 103.901               | 7.712              | 103.898               | 0.074                   | 0.002                   |
| <b>92G</b>  | 8.567              | 108.949               | 8.649              | 108.458               | 8.564              | 108.557               | 0.128                   | 0.088                   |
| <b>94G</b>  | 8.937              | 107.875               | 8.937              | 107.534               | X                  | X                     | 0.068                   | —                       |
| <b>105G</b> | X                  | X                     | 8.487              | 108.189               | 8.487              | 107.165               | —                       | 0.205                   |
| <b>118G</b> | 9.327              | 106.444               | 9.415              | 106.430               | 9.389              | 106.433               | 0.088                   | 0.026                   |
| <b>120G</b> | 7.969              | 105.521               | 7.967              | 105.562               | 7.945              | 105.220               | 0.008                   | 0.072                   |
| <b>123F</b> | 10.086             | 126.487               | 10.085             | 125.922               | 10.158             | 125.454               | 0.113                   | 0.119                   |
| <b>124N</b> | X                  | X                     | 9.604              | 122.208               | X                  | X                     | —                       | —                       |
| <b>131I</b> | 8.830              | 124.461               | 8.868              | 123.959               | 8.887              | 124.103               | 0.107                   | 0.035                   |
| <b>132D</b> | 9.013              | 130.121               | 9.068              | 130.170               | X                  | X                     | 0.056                   | —                       |
| <b>151G</b> | 9.864              | 112.073               | 9.894              | 111.808               | 9.758              | 111.882               | 0.061                   | 0.137                   |
| <b>153G</b> | 8.630              | 103.914               | 8.602              | 103.716               | 8.641              | 103.971               | 0.048                   | 0.064                   |

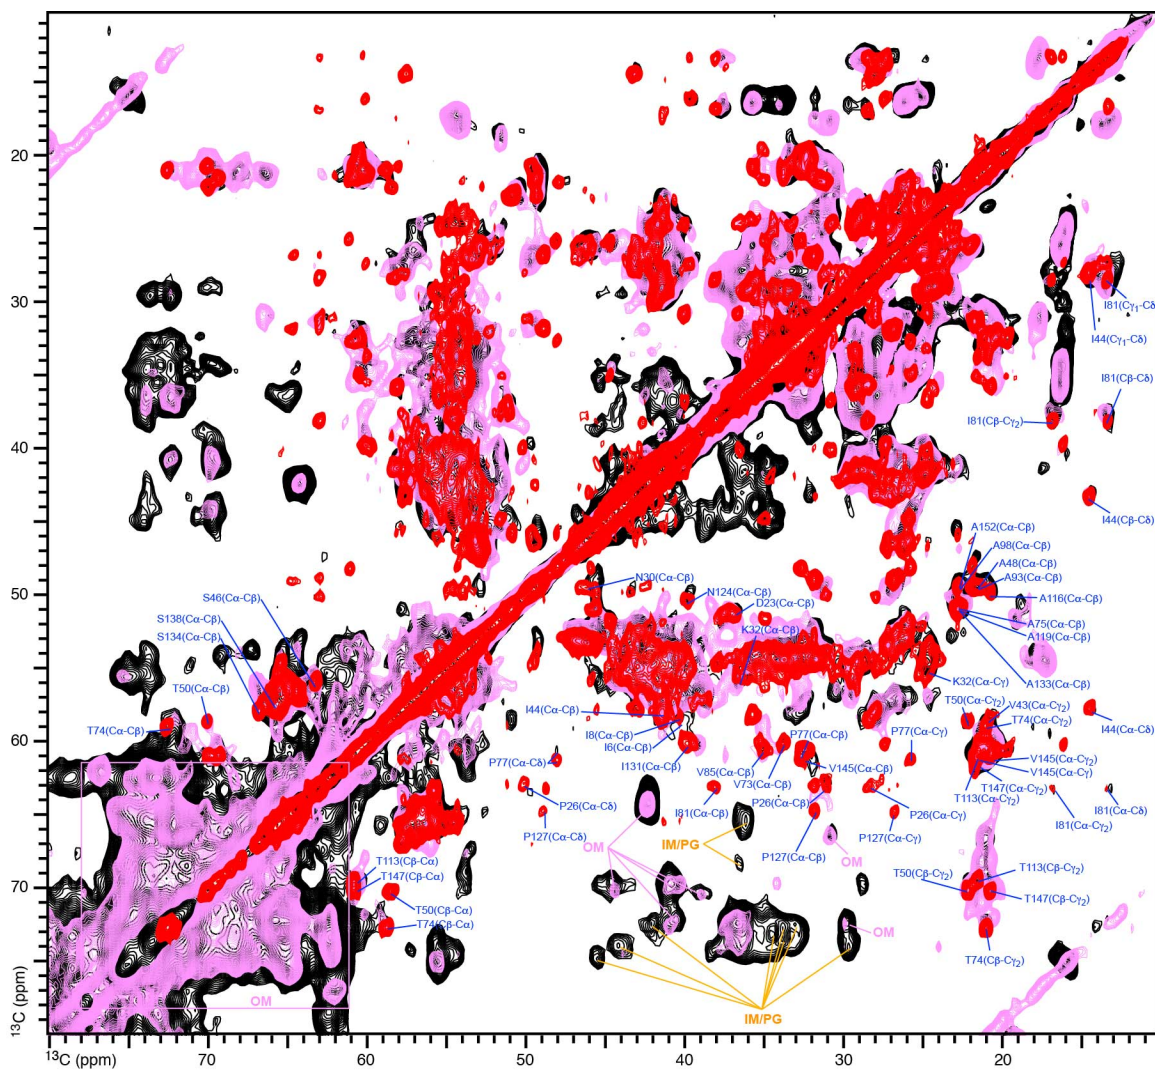

**Figure S4.** 2D PDSD  $^{13}\text{C}$ - $^{13}\text{C}$  solid-state NMR spectra of  $^{15}\text{N}/^{13}\text{C}$ -Ail in *E. coli* cell envelopes (black), *E. coli* outer membranes (pink), or reconstituted liposomes (red). Resolved assigned Ail peaks are marked (blue). Signals from components of the bacterial outer membrane (pink) or inner membrane and peptidoglycan (gold) are tentatively assigned by spectral comparison. Spectra were recorded at 750 MHz, 7°C, with a MAS rate of 11 kHz, and 204 t1 increments with 304 transients for the cell envelope sample, or 400 t1 increments and 32 transients for the outer membrane sample, or 512 t1 increments and 64 transients for the liposome sample.
